# Supplementary material for: Multidimensional all-inorganic frameworks based on new molybdovanadate cluster of [VMo7O28]9−with Cu(ii) linker showing semiconducting behavior
Source: Royal Society of Chemistry journal article supplement (doi:10.1039/c4ce00831f), 2014-06-12
Supplement: c4ce00831f1.pdf [file c4ce00831f1.pdf]

## Supporting Information

**Table S1.** X-ray crystallographic data for **1-3**.

|                                                                           | 1                                                                                                  | 2                                                                                                    | 3                                                                                                                        |
|---------------------------------------------------------------------------|----------------------------------------------------------------------------------------------------|------------------------------------------------------------------------------------------------------|--------------------------------------------------------------------------------------------------------------------------|
| formula                                                                   | H <sub>152</sub> Cu <sub>8</sub> Mo <sub>30</sub> N <sub>20</sub> O <sub>169</sub> V <sub>10</sub> | H <sub>144</sub> Cu <sub>11</sub> Mo <sub>30</sub> N <sub>10</sub> NaO <sub>181</sub> V <sub>9</sub> | H <sub>145</sub> Cu <sub>8.5</sub> Mo <sub>23</sub> N <sub>9.5</sub> Na <sub>0.5</sub> O <sub>158.5</sub> V <sub>9</sub> |
| <i>M<sub>r</sub></i> [g]                                                  | 7033.34                                                                                            | 7239.84                                                                                              | 6031.92                                                                                                                  |
| crystal system                                                            | triclinic                                                                                          | Monoclinic                                                                                           | Orthorhombic                                                                                                             |
| space group                                                               | <i>P</i> $\bar{1}$                                                                                 | C2/c                                                                                                 | Pnmm                                                                                                                     |
| <i>Z</i>                                                                  | 1                                                                                                  | 4                                                                                                    | 4                                                                                                                        |
| <i>a</i> [Å]                                                              | 14.7333 (3)                                                                                        | 53.884(5)                                                                                            | 28.2107(14)                                                                                                              |
| <i>b</i> [Å]                                                              | 17.2359 (6)                                                                                        | 13.9563(11)                                                                                          | 23.9375(12)                                                                                                              |
| <i>c</i> [Å]                                                              | 18.2871 (4)                                                                                        | 26.848(2)                                                                                            | 26.1899 (13)                                                                                                             |
| $\alpha$ [°]                                                              | 96.789 (2)°                                                                                        | 90                                                                                                   | 90                                                                                                                       |
| $\beta$ [°]                                                               | 98.188 (2)°                                                                                        | 104.181(2)                                                                                           | 90                                                                                                                       |
| $\gamma$ [°]                                                              | 93.537 (2)°                                                                                        | 90                                                                                                   | 90                                                                                                                       |
| <i>V</i> [Å <sup>3</sup> ]                                                | 4549.7 (2)                                                                                         | 19575(3)                                                                                             | 17685.9 (15)                                                                                                             |
| $\rho_{\text{calcd}}$ [g cm <sup>-3</sup> ]                               | 2.567                                                                                              | 2.457                                                                                                | 2.188                                                                                                                    |
| $\mu$ [mm <sup>-1</sup> ]                                                 | 3.504                                                                                              | 3.536                                                                                                | 3.120                                                                                                                    |
| Reflections collected                                                     | 15926                                                                                              | 17200                                                                                                | 15938                                                                                                                    |
| Radiation type                                                            | MoK $\alpha$                                                                                       | MoK $\alpha$                                                                                         | MoK $\alpha$                                                                                                             |
| <i>R</i> <sub>1</sub> [ <i>I</i> >2 $\sigma$ ( <i>I</i> )] <sup>[a]</sup> | 0.0453                                                                                             | 0.0663                                                                                               | 0.0657                                                                                                                   |
| <i>wR</i> <sub>2</sub> [all data] <sup>[b]</sup>                          | 0.135                                                                                              | 0.215                                                                                                | 0.1569                                                                                                                   |
| GOF on <i>F</i> <sup>2</sup>                                              | 1.053                                                                                              | 1.004                                                                                                | 1.061                                                                                                                    |

[a]  $R_1 = \sum |F_o| - |F_c| / \sum |F_c|$ ; [b]  $wR_2 = [\sum w(F_o^2 - F_c^2)^2 / \sum w(F_o^2)^2]^{1/2}$  with  $1/w = \sigma^2 F_o^2 + aP^2 + bP$  and  $P = F_o^2 + 2F_c^2/3$ .

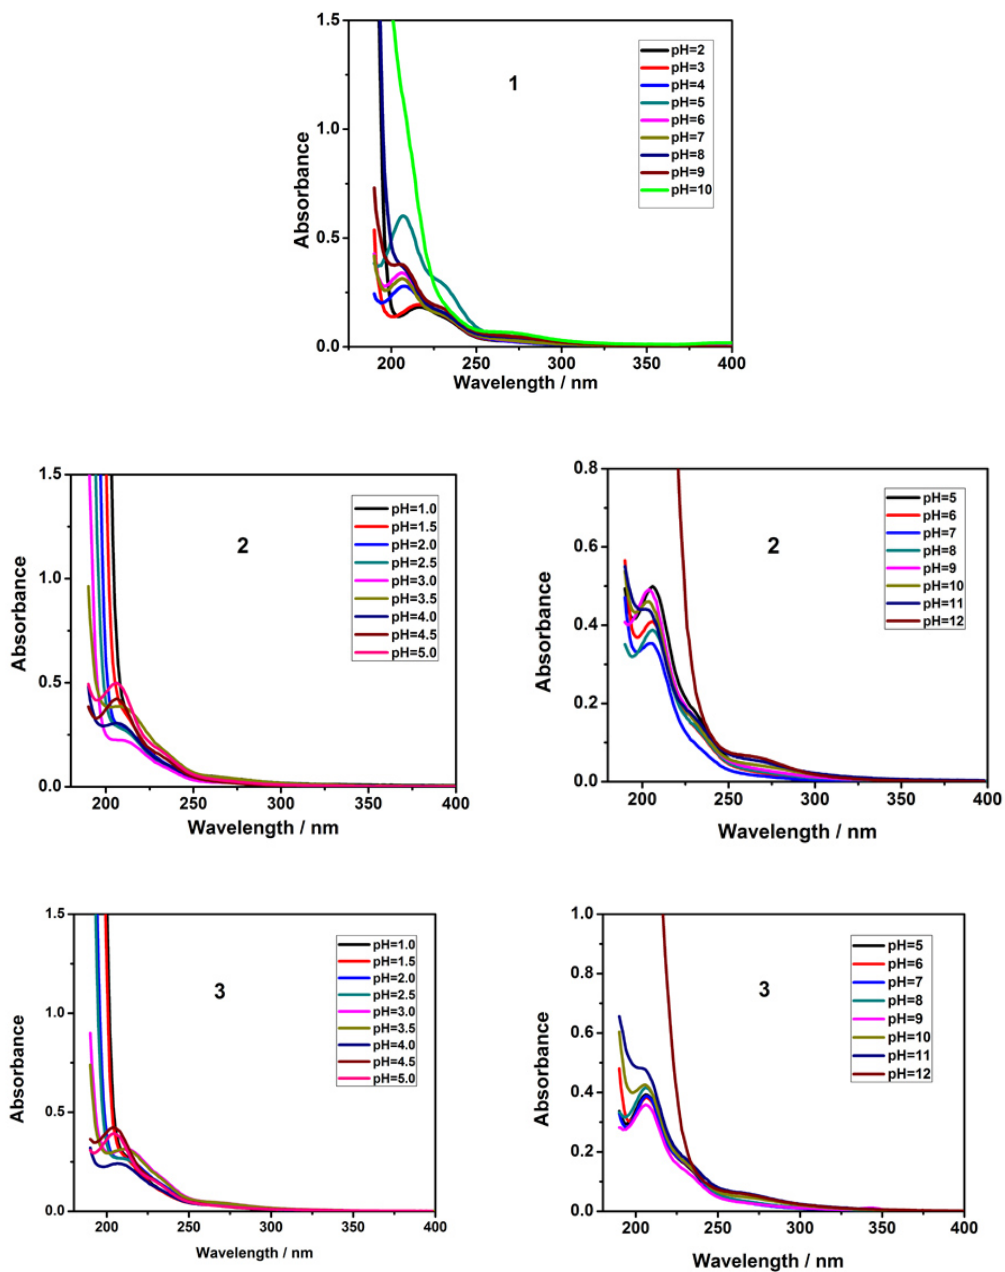

**Figure S1.** Influence of the pH values on the stability of **1**, **2** and **3** in aqueous solution: (a) The UV spectral evolution in pH=1-5 ; (b) The UV spectral evolution in pH =5-10.

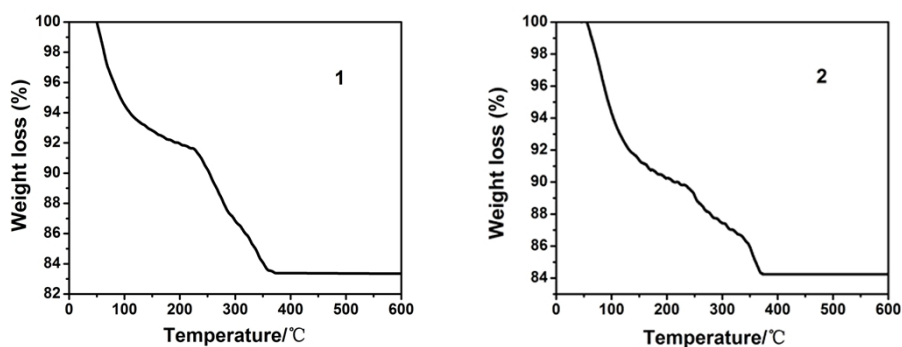

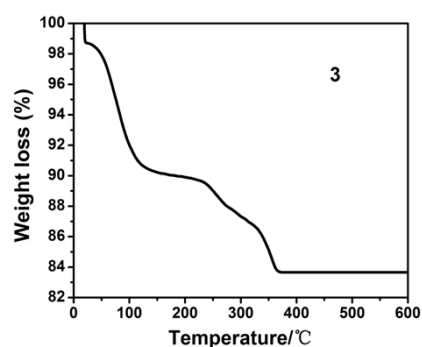

Figure S2. TG curves for compounds 1–3.

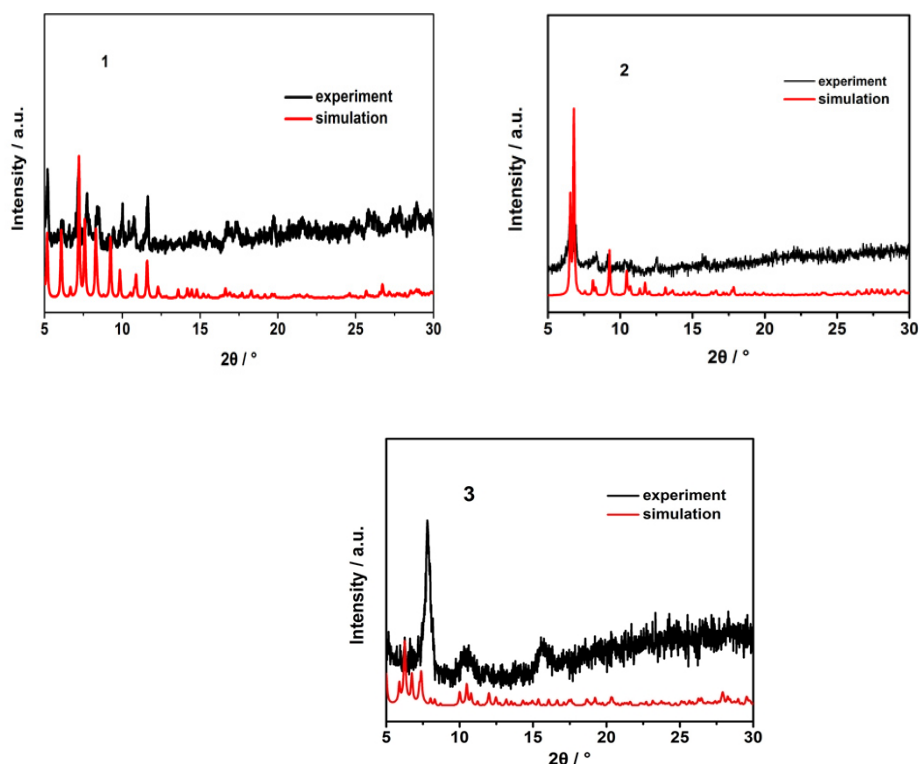

Fig S3. The PXRD pattern and simulated pattern of 1-3.

### FT-IR Spectroscopy

The IR spectrum of **1** exhibits very strong bands at 908 and 856  $\text{cm}^{-1}$  for characteristics of  $\nu(\text{V}=\text{O})$  and  $\nu(\text{Mo}=\text{O})$  and strong bands at 796 and 715  $\text{cm}^{-1}$  for characteristics of  $\nu(\text{M}-\text{O}-\text{M})$  ( $\text{M} = \text{Mo}$  or  $\text{V}$ ). Bands at 676  $\text{cm}^{-1}$  are likely due to  $\nu_{\text{as}}(\text{M}-(\mu_3\text{O}))$  ( $\text{M} = \text{Mo}$  or  $\text{V}$ ) mode (Fig. S4, ESI†). The bands at 3432 and 1628  $\text{cm}^{-1}$  are ascribed to water molecules, respectively. The band at 3145  $\text{cm}^{-1}$  ascribed to the N–H stretching vibration of ammonium ion. The IR spectra of complexes **2–3** are similar to that of compound **1**.

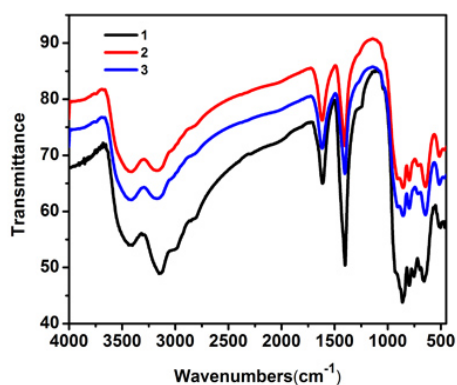

Fig S4. The IR spectra of 1–3.

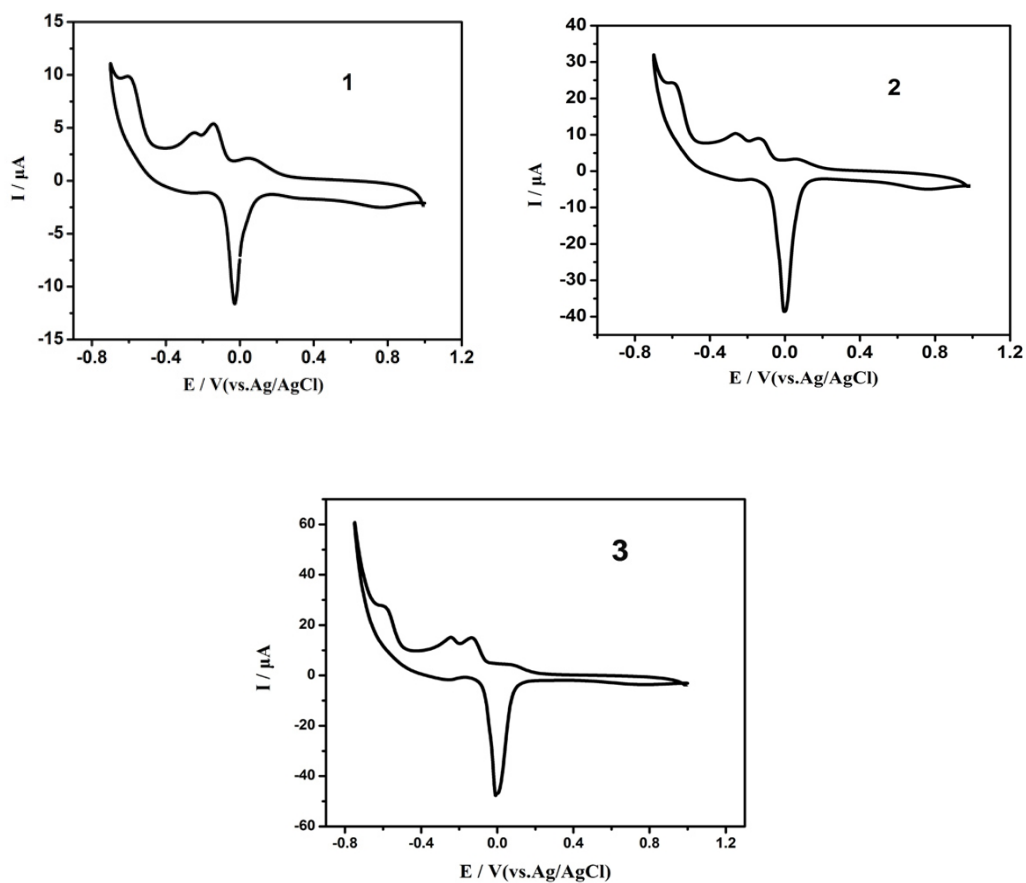

Figure S5. Cyclic voltammograms of compounds 1–3 in 0.4M  $\text{CH}_3\text{COONa}+\text{CH}_3\text{COOH}$  buffer solution (pH=4.5) at a scan rate of  $10 \text{ mV s}^{-1}$

Table S2. Selected bond lengths [ $\text{\AA}$ ] and bond angles ( $^\circ$ ) for the compound 1.

|             |          |                    |          |
|-------------|----------|--------------------|----------|
| O(1)-Mo(5)  | 1.970(5) | Mo(1)-O(5)#1       | 1.775(5) |
| O(1)-Mo(3)  | 1.985(5) | O(6)-Cu(4)-O(14)#1 | 177.5(2) |
| O(1)-Mo(12) | 2.245(5) | O(6)-Cu(4)-O(5)    | 90.2(2)  |

---

|               |          |                       |            |
|---------------|----------|-----------------------|------------|
| O(2)-Mo(12)   | 1.948(6) | O(14)#1-Cu(4)-O(5)    | 92.1(2)    |
| O(2)-Mo(3)    | 2.197(5) | O(6)-Cu(4)-O(11)      | 90.7(2)    |
| O(2)-Mo(6)    | 2.199(5) | O(14)#1-Cu(4)-O(11)   | 86.9(2)    |
| O(3)-Mo(6)    | 1.973(5) | O(6)-Cu(4)-O(35)      | 88.1(2)    |
| O(3)-Mo(2)    | 1.985(6) | O(14)#1-Cu(4)-O(35)   | 92.9(2)    |
| O(3)-Mo(12)   | 2.183(5) | O(5)-Cu(4)-O(35)      | 92.9(2)    |
| O(4)-Mo(3)    | 1.677(5) | O(11)-Cu(4)-O(35)     | 92.0(2)    |
| O(5)-Mo(1)#1  | 1.775(5) | O(6)-Cu(4)-O(11)#1    | 91.01(19)  |
| O(5)-Cu(4)    | 1.988(5) | O(14)#1-Cu(4)-O(11)#1 | 87.69(19)  |
| O(6)-Mo(3)    | 1.756(5) | O(5)-Cu(4)-O(11)#1    | 93.9(2)    |
| O(6)-Cu(4)    | 1.956(5) | O(11)-Cu(4)-O(11)#1   | 81.32(19)  |
| O(7)-Mo(1)    | 1.777(5) | O(35)-Cu(4)-O(11)#1   | 173.20(18) |
| O(7)-Cu(3)    | 1.973(5) | O(38)-V(1)-O(24)      | 109.0(3)   |
| O(8)-V(2)     | 1.772(5) | O(38)-V(1)-O(37)      | 109.4(3)   |
| O(8)-Mo(1)    | 2.253(5) | O(24)-V(1)-O(37)      | 109.6(3)   |
| O(8)-Mo(5)    | 2.350(4) | O(38)-V(1)-O(25)      | 106.9(3)   |
| O(8)-Mo(2)    | 2.394(5) | O(24)-V(1)-O(25)      | 110.9(3)   |
| O(9)-V(2)     | 1.680(5) | O(37)-V(1)-O(25)      | 111.0(3)   |
| O(9)-Cu(3)    | 2.119(5) | O(11)-V(2)-O(9)       | 108.3(2)   |
| O(9)-Cu(2)    | 2.285(5) | O(11)-V(2)-O(12)      | 107.6(3)   |
| O(10)-Mo(4)   | 1.794(5) | O(9)-V(2)-O(12)       | 109.0(2)   |
| O(10)-Cu(2)   | 1.946(5) | O(11)-V(2)-O(8)       | 109.8(2)   |
| O(11)-V(2)    | 1.674(5) | O(9)-V(2)-O(8)        | 107.6(2)   |
| O(11)-Cu(4)   | 2.017(5) | O(12)-V(2)-O(8)       | 114.3(2)   |
| O(11)-Cu(4)#1 | 2.358(5) | O(47)-V(3)-O(15)      | 105.3(3)   |
| O(12)-V(2)    | 1.754(5) | O(47)-V(3)-O(17)      | 110.6(3)   |
| O(12)-Mo(4)   | 2.284(5) | O(15)-V(3)-O(17)      | 107.0(3)   |
| O(12)-Mo(3)   | 2.347(5) | O(47)-V(3)-O(16)      | 112.4(3)   |
| O(12)-Mo(6)   | 2.399(5) | O(15)-V(3)-O(16)      | 106.2(3)   |
| O(14)-Mo(5)   | 1.761(5) | O(17)-V(3)-O(16)      | 114.6(2)   |
| O(14)-Cu(4)#1 | 1.963(5) | O(31)-V(4)-O(57)      | 105.5(3)   |
| O(15)-V(3)    | 1.660(5) | O(31)-V(4)-O(21)      | 105.8(3)   |
| O(15)-Cu(3)   | 2.065(6) | O(57)-V(4)-O(21)      | 111.3(3)   |
| O(16)-V(3)    | 1.815(5) | O(31)-V(4)-O(20)      | 106.9(3)   |
| O(16)-Mo(15)  | 2.002(5) | O(57)-V(4)-O(20)      | 112.3(3)   |
| O(16)-Mo(11)  | 2.282(5) | O(21)-V(4)-O(20)      | 114.2(3)   |
| O(17)-V(3)    | 1.807(5) | O(69)-V(5)-O(70)      | 100.0(7)   |
| O(17)-Mo(8)   | 2.009(5) | O(69)-V(5)-O(18)      | 106.6(4)   |
| O(17)-Mo(9)   | 2.258(5) | O(70)-V(5)-O(18)      | 110.5(6)   |
| O(18)-V(5)    | 1.882(5) | O(69)-V(5)-O(42)      | 105.5(4)   |
| O(18)-Mo(9)   | 1.920(5) | O(70)-V(5)-O(42)      | 112.4(6)   |
| O(18)-Mo(8)   | 2.127(5) | O(18)-V(5)-O(42)      | 119.7(3)   |
| O(20)-V(4)    | 1.825(5) | O(72)-V(6)-O(71)      | 89.8(12)   |
| O(20)-Mo(14)  | 1.983(5) | O(72)-V(6)-O(22)      | 109.0(7)   |

---

---

|              |          |                   |           |
|--------------|----------|-------------------|-----------|
| O(20)-Mo(7)  | 2.252(5) | O(71)-V(6)-O(22)  | 114.0(8)  |
| O(21)-V(4)   | 1.823(5) | O(72)-V(6)-O(43)  | 112.9(7)  |
| O(21)-Mo(10) | 2.006(5) | O(71)-V(6)-O(43)  | 111.0(9)  |
| O(21)-Mo(13) | 2.254(5) | O(22)-V(6)-O(43)  | 117.0(3)  |
| O(22)-Mo(11) | 1.892(6) | O(68)-Cu(2)-O(23) | 93.5(2)   |
| O(22)-V(6)   | 1.898(7) | O(10)-Cu(2)-O(54) | 92.3(2)   |
| O(22)-Mo(15) | 2.121(6) | O(68)-Cu(2)-O(54) | 82.8(2)   |
| O(23)-Mo(10) | 1.732(5) | O(23)-Cu(2)-O(54) | 173.6(2)  |
| O(23)-Cu(2)  | 2.064(5) | O(10)-Cu(2)-O(31) | 91.2(2)   |
| O(24)-V(1)   | 1.723(5) | O(68)-Cu(2)-O(31) | 96.2(2)   |
| O(24)-Mo(9)  | 2.327(5) | O(23)-Cu(2)-O(31) | 86.0(2)   |
| O(24)-Mo(11) | 2.348(5) | O(54)-Cu(2)-O(31) | 89.2(2)   |
| O(25)-V(1)   | 1.733(5) | O(10)-Cu(2)-O(9)  | 94.4(2)   |
| O(25)-Mo(10) | 2.326(5) | O(68)-Cu(2)-O(9)  | 78.51(19) |
| O(25)-Mo(15) | 2.349(5) | O(23)-Cu(2)-O(9)  | 91.01(19) |
| O(26)-Mo(15) | 1.733(5) | O(54)-Cu(2)-O(9)  | 93.35(19) |
| O(26)-Cu(3)  | 2.172(6) | O(31)-Cu(2)-O(9)  | 173.8(2)  |
| O(27)-Mo(8)  | 1.718(5) | O(7)-Cu(3)-O(68)  | 169.9(2)  |
| O(27)-Cu(1)  | 2.190(5) | O(7)-Cu(3)-O(15)  | 88.7(2)   |
| O(28)-Mo(9)  | 1.711(5) | O(68)-Cu(3)-O(15) | 96.9(2)   |
| O(29)-Mo(5)  | 1.840(6) | O(7)-Cu(3)-O(9)   | 92.8(2)   |
| O(29)-Mo(1)  | 2.109(5) | O(68)-Cu(3)-O(9)  | 82.5(2)   |
| O(30)-Mo(3)  | 1.832(5) | O(15)-Cu(3)-O(9)  | 174.3(2)  |
| O(30)-Mo(4)  | 2.094(5) | O(7)-Cu(3)-O(26)  | 97.1(2)   |
| O(31)-V(4)   | 1.631(5) | O(68)-Cu(3)-O(26) | 91.57(19) |
| O(31)-Cu(2)  | 2.173(6) | O(15)-Cu(3)-O(26) | 87.1(2)   |
| O(32)-Mo(14) | 1.715(5) | O(9)-Cu(3)-O(26)  | 87.3(2)   |
| O(32)-Cu(1)  | 2.121(5) | O(7)-Cu(3)-O(55)  | 91.7(2)   |
| O(33)-Mo(14) | 1.878(5) | O(68)-Cu(3)-O(55) | 79.7(2)   |
| O(33)-Mo(8)  | 1.896(5) | O(15)-Cu(3)-O(55) | 92.0(2)   |
| O(34)-Mo(5)  | 1.716(5) | O(9)-Cu(3)-O(55)  | 93.4(2)   |
| O(35)-Mo(4)  | 1.736(5) | O(26)-Cu(3)-O(55) | 171.1(2)  |
| O(35)-Cu(4)  | 2.312(6) | V(1)-O(24)-Mo(9)  | 129.9(3)  |
| O(36)-Mo(12) | 1.978(6) | V(1)-O(24)-Mo(11) | 129.0(3)  |
| O(36)-Mo(2)  | 2.203(5) | V(1)-O(25)-Mo(10) | 129.6(3)  |
| O(36)-Mo(5)  | 2.216(5) | V(1)-O(25)-Mo(15) | 129.5(3)  |
| O(37)-V(1)   | 1.721(5) | V(4)-O(31)-Cu(2)  | 139.8(3)  |
| O(37)-Mo(13) | 2.326(5) | V(1)-O(37)-Mo(13) | 128.9(3)  |
| O(37)-Mo(7)  | 2.372(5) | V(1)-O(37)-Mo(7)  | 130.2(3)  |
| O(38)-V(1)   | 1.676(5) | V(1)-O(38)-Mo(8)  | 132.9(3)  |
| O(38)-Mo(8)  | 2.368(5) | V(1)-O(38)-Mo(14) | 131.7(3)  |
| O(38)-Mo(14) | 2.376(5) | V(5)-O(42)-Mo(7)  | 136.0(3)  |
| O(39)-Mo(9)  | 1.711(5) | V(5)-O(42)-Mo(14) | 109.8(2)  |
| O(40)-Mo(7)  | 1.930(5) | Mo(13)-O(43)-V(6) | 132.7(3)  |

---

|              |          |                     |            |
|--------------|----------|---------------------|------------|
| O(40)-Mo(13) | 1.955(6) | V(6)-O(43)-Mo(10)   | 113.3(3)   |
| O(41)-Mo(10) | 1.902(6) | Cu(2)-O(54)-Cu(1)   | 92.3(2)    |
| O(41)-Mo(15) | 1.906(6) | Cu(1)-O(55)-Cu(3)   | 92.7(2)    |
| O(42)-V(5)   | 1.916(6) | Cu(1)-O(68)-Cu(2)   | 103.0(2)   |
| O(42)-Mo(7)  | 1.919(5) | Cu(1)-O(68)-Cu(3)   | 103.9(2)   |
| O(42)-Mo(14) | 2.116(5) | Cu(2)-O(68)-Cu(3)   | 106.3(2)   |
| O(43)-Mo(13) | 1.883(5) | O(68)-Cu(1)-O(61)   | 173.1(2)   |
| O(43)-V(6)   | 1.896(7) | O(68)-Cu(1)-O(32)   | 96.30(19)  |
| O(43)-Mo(10) | 2.113(5) | O(61)-Cu(1)-O(32)   | 88.6(2)    |
| O(44)-Mo(10) | 1.680(6) | O(68)-Cu(1)-O(55)   | 81.34(19)  |
| O(45)-Mo(2)  | 1.806(6) | O(61)-Cu(1)-O(55)   | 93.8(2)    |
| O(45)-Mo(1)  | 2.113(5) | O(32)-Cu(1)-O(55)   | 177.6(2)   |
| O(46)-Mo(1)  | 1.720(6) | O(68)-Cu(1)-O(27)   | 95.20(19)  |
| O(47)-V(3)   | 1.627(6) | O(61)-Cu(1)-O(27)   | 89.9(2)    |
| O(48)-Mo(15) | 1.693(6) | O(32)-Cu(1)-O(27)   | 87.1(2)    |
| O(49)-Mo(11) | 1.938(5) | O(55)-Cu(1)-O(27)   | 92.7(2)    |
| O(49)-Mo(9)  | 1.943(5) | O(68)-Cu(1)-O(54)   | 79.5(2)    |
| O(50)-Mo(7)  | 1.696(6) | O(61)-Cu(1)-O(54)   | 95.3(3)    |
| O(51)-Mo(13) | 1.704(6) | O(32)-Cu(1)-O(54)   | 95.1(2)    |
| O(52)-Mo(8)  | 1.665(5) | O(55)-Cu(1)-O(54)   | 84.8(2)    |
| O(53)-Mo(14) | 1.674(6) | O(27)-Cu(1)-O(54)   | 174.40(19) |
| O(54)-Mo(6)  | 1.784(5) | O(10)-Cu(2)-O(68)   | 171.1(2)   |
| O(54)-Cu(2)  | 2.070(5) | O(10)-Cu(2)-O(23)   | 92.0(2)    |
| O(54)-Cu(1)  | 2.222(6) | Mo(5)-O(14)-Cu(4)#1 | 135.8(3)   |
| O(55)-Mo(2)  | 1.782(5) | V(3)-O(15)-Cu(3)    | 140.4(3)   |
| O(55)-Cu(1)  | 2.137(6) | V(3)-O(16)-Mo(15)   | 138.7(3)   |
| O(55)-Cu(3)  | 2.178(5) | V(3)-O(16)-Mo(11)   | 117.4(3)   |
| O(56)-Mo(7)  | 1.707(6) | V(3)-O(17)-Mo(8)    | 138.9(3)   |
| O(57)-V(4)   | 1.641(6) | V(3)-O(17)-Mo(9)    | 116.8(3)   |
| O(58)-Mo(13) | 1.716(6) | V(5)-O(18)-Mo(9)    | 136.7(3)   |
| O(59)-Mo(11) | 1.710(6) | V(5)-O(18)-Mo(8)    | 110.1(3)   |
| O(60)-Mo(11) | 1.709(6) | V(4)-O(20)-Mo(14)   | 137.4(3)   |
| O(61)-Cu(1)  | 1.987(6) | V(4)-O(20)-Mo(7)    | 117.2(2)   |
| O(62)-Mo(4)  | 1.705(6) | V(4)-O(21)-Mo(10)   | 137.5(3)   |
| O(63)-Mo(12) | 1.705(6) | V(4)-O(21)-Mo(13)   | 117.7(3)   |
| O(64)-Mo(6)  | 1.702(6) | Mo(11)-O(22)-V(6)   | 134.5(3)   |
| O(65)-Mo(2)  | 1.706(5) | V(6)-O(22)-Mo(15)   | 112.8(3)   |
| O(66)-Mo(6)  | 1.808(6) | V(2)-O(11)-Cu(4)    | 128.4(3)   |
| O(66)-Mo(4)  | 2.164(6) | V(2)-O(11)-Cu(4)#1  | 118.8(2)   |
| O(67)-Mo(12) | 1.707(6) | Cu(4)-O(11)-Cu(4)#1 | 98.68(19)  |
| O(68)-Cu(1)  | 1.968(5) | V(2)-O(12)-Mo(4)    | 126.1(2)   |
| O(68)-Cu(2)  | 1.989(5) | V(2)-O(12)-Mo(3)    | 116.4(2)   |
| O(68)-Cu(3)  | 1.997(5) | V(2)-O(12)-Mo(6)    | 121.8(2)   |
| O(69)-V(5)   | 1.511(9) | V(2)-O(9)-Cu(2)     | 118.3(3)   |

|               |           |                  |           |
|---------------|-----------|------------------|-----------|
| O(70)-V(5)    | 1.620(14) | Cu(3)-O(9)-Cu(2) | 92.72(19) |
| O(71)-V(6)    | 1.58(2)   | V(2)-O(9)-Cu(3)  | 123.1(3)  |
| O(72)-V(6)    | 1.515(18) | V(2)-O(8)-Mo(1)  | 125.7(2)  |
| Cu(4)-O(14)#1 | 1.963(5)  | V(2)-O(8)-Mo(5)  | 118.2(2)  |
| Cu(4)-O(11)#1 | 2.358(5)  | V(2)-O(8)-Mo(2)  | 120.1(2)  |

Symmetry code for 1: #1 -x+1,-y+2,-z+2

Table S3. Selected bond lengths [Å] and bond angles (°) for the compound 2.

|             |           |                   |          |
|-------------|-----------|-------------------|----------|
| Mo(1)-O(22) | 1.705(9)  | O(11)-V(4)-O(2)   | 105.7(4) |
| Mo(1)-O(17) | 1.741(8)  | O(50)-V(4)-O(2)   | 111.9(4) |
| Mo(1)-O(23) | 1.921(8)  | O(11)-V(4)-O(3)   | 106.0(4) |
| Mo(1)-O(3)  | 1.988(8)  | O(50)-V(4)-O(3)   | 113.4(4) |
| Mo(1)-O(9)  | 2.061(8)  | O(2)-V(4)-O(3)    | 111.8(4) |
| Mo(1)-O(14) | 2.347(8)  | O(1B)-V(5)-O(1A)  | 104.4(8) |
| Mo(1)-Na(1) | 3.71(4)   | O(1B)-V(5)-O(4)   | 109.3(7) |
| Mo(2)-O(20) | 1.691(10) | O(1A)-V(5)-O(4)   | 109.8(6) |
| Mo(2)-O(10) | 1.699(9)  | O(1B)-V(5)-O(5)   | 110.8(7) |
| Mo(2)-O(9)  | 1.867(8)  | O(1A)-V(5)-O(5)   | 107.1(6) |
| Mo(2)-O(29) | 1.942(8)  | O(4)-V(5)-O(5)    | 114.9(4) |
| Mo(2)-O(3)  | 2.294(8)  | O(44)-Cu(1)-O(17) | 92.7(3)  |
| Mo(2)-O(21) | 2.304(8)  | O(19)-Cu(1)-O(17) | 92.1(3)  |
| Mo(3)-O(28) | 1.659(8)  | O(44)-Cu(1)-O(15) | 95.6(4)  |
| Mo(3)-O(13) | 1.720(8)  | O(19)-Cu(1)-O(15) | 79.9(4)  |
| Mo(3)-O(27) | 1.897(8)  | O(44)-Cu(1)-O(11) | 88.3(3)  |
| Mo(3)-O(2)  | 1.985(8)  | O(19)-Cu(1)-O(11) | 98.0(3)  |
| Mo(3)-O(4)  | 2.135(8)  | O(17)-Cu(1)-O(11) | 85.0(3)  |
| Mo(3)-O(24) | 2.333(8)  | O(15)-Cu(1)-O(11) | 93.0(3)  |
| Mo(4)-O(51) | 1.684(9)  | O(44)-Cu(1)-O(12) | 92.9(3)  |
| Mo(4)-O(18) | 1.736(8)  | O(19)-Cu(1)-O(12) | 81.4(3)  |
| Mo(4)-O(23) | 1.906(9)  | O(17)-Cu(1)-O(12) | 87.2(3)  |
| Mo(4)-O(26) | 2.019(8)  | O(15)-Cu(1)-O(12) | 94.6(3)  |
| Mo(4)-O(6)  | 2.070(8)  | O(19)-Cu(2)-O(30) | 97.0(3)  |
| Mo(4)-O(14) | 2.348(8)  | O(52)-Cu(2)-O(30) | 87.7(4)  |
| Mo(5)-O(25) | 1.713(9)  | O(19)-Cu(2)-O(15) | 79.2(3)  |
| Mo(5)-O(41) | 1.735(10) | O(52)-Cu(2)-O(15) | 96.2(4)  |
| Mo(5)-O(5)  | 1.927(9)  | O(19)-Cu(2)-O(13) | 96.5(3)  |
| Mo(5)-O(58) | 1.946(8)  | O(52)-Cu(2)-O(13) | 86.9(4)  |
| Mo(5)-O(8)  | 2.232(8)  | O(30)-Cu(2)-O(13) | 83.9(3)  |
| Mo(5)-O(1)  | 2.329(8)  | O(15)-Cu(2)-O(13) | 95.7(3)  |
| Mo(6)-O(49) | 1.705(9)  | O(19)-Cu(2)-O(54) | 77.8(3)  |
| Mo(6)-O(7)  | 1.717(8)  | O(52)-Cu(2)-O(54) | 98.7(4)  |
| Mo(6)-O(29) | 1.921(8)  | O(30)-Cu(2)-O(54) | 96.2(3)  |
| Mo(6)-O(4)  | 1.946(8)  | O(15)-Cu(2)-O(54) | 83.8(3)  |
| Mo(6)-O(2)  | 2.286(8)  | O(33)-Cu(3)-O(18) | 92.0(4)  |



---

|              |           |                       |           |
|--------------|-----------|-----------------------|-----------|
| Mo(6)-O(21)  | 2.325(8)  | O(33)-Cu(3)-O(54)     | 93.6(4)   |
| Mo(8)-O(39)  | 1.687(10) | O(18)-Cu(3)-O(19)     | 90.8(3)   |
| Mo(8)-O(67)  | 1.714(10) | O(54)-Cu(3)-O(19)     | 84.2(3)   |
| Mo(8)-O(6)   | 1.887(9)  | O(33)-Cu(3)-O(31)     | 92.0(4)   |
| Mo(8)-O(58)  | 1.947(10) | O(18)-Cu(3)-O(31)     | 87.4(3)   |
| Mo(8)-O(26)  | 2.250(8)  | O(54)-Cu(3)-O(31)     | 88.6(4)   |
| Mo(8)-O(1)   | 2.327(8)  | O(19)-Cu(3)-O(31)     | 96.1(3)   |
| Mo(8)-Na(1)  | 3.59(6)   | O(33)-Cu(3)-O(12)     | 91.9(3)   |
| Mo(9)-O(42)  | 1.636(9)  | O(18)-Cu(3)-O(12)     | 87.5(3)   |
| Mo(9)-O(30)  | 1.703(8)  | O(54)-Cu(3)-O(12)     | 96.1(3)   |
| Mo(9)-O(27)  | 1.906(8)  | O(19)-Cu(3)-O(12)     | 80.2(3)   |
| Mo(9)-O(8)   | 2.013(8)  | O(40)-Cu(4)-O(38)     | 88.4(3)   |
| Mo(9)-O(5)   | 2.138(8)  | O(61)#1-Cu(4)-O(38)   | 89.8(3)   |
| Mo(9)-O(24)  | 2.321(9)  | O(40)-Cu(4)-O(53)#1   | 91.6(4)   |
| Mo(10)-O(47) | 1.705(10) | O(61)#1-Cu(4)-O(53)#1 | 89.9(4)   |
| Mo(10)-O(48) | 1.778(11) | O(40)-Cu(4)-O(59)     | 90.4(4)   |
| Mo(10)-O(15) | 1.829(8)  | O(61)#1-Cu(4)-O(59)   | 92.7(4)   |
| Mo(10)-O(56) | 1.968(10) | O(38)-Cu(4)-O(59)     | 92.6(3)   |
| Mo(10)-O(55) | 2.203(9)  | O(53)#1-Cu(4)-O(59)   | 93.1(4)   |
| Mo(10)-O(32) | 2.379(8)  | O(40)-Cu(4)-O(38)#1   | 89.2(4)   |
| Mo(11)-O(63) | 1.739(12) | O(61)#1-Cu(4)-O(38)#1 | 87.5(4)   |
| Mo(11)-O(53) | 1.749(9)  | O(38)-Cu(4)-O(38)#1   | 80.4(3)   |
| Mo(11)-O(44) | 1.799(8)  | O(53)#1-Cu(4)-O(38)#1 | 94.0(3)   |
| Mo(11)-O(62) | 2.083(9)  | O(3B)-Cu(6)-O(16)#2   | 80.0(10)  |
| Mo(11)-O(48) | 2.118(9)  | O(3B)-Cu(6)-O(50)     | 100.1(10) |
| Mo(11)-O(32) | 2.260(9)  | O(3B)-Cu(6)-O(2W)     | 156.4(12) |
| Mo(12)-O(46) | 1.679(10) | O(16)#2-Cu(6)-O(2W)   | 90.4(5)   |
| Mo(12)-O(61) | 1.755(8)  | O(50)-Cu(6)-O(2W)     | 90.2(5)   |
| Mo(12)-O(62) | 1.813(11) | O(16)#2-Cu(6)-O(3W)   | 88.4(6)   |
| Mo(12)-O(57) | 1.969(11) | O(50)-Cu(6)-O(3W)     | 91.0(6)   |
| Mo(12)-O(55) | 2.208(9)  | O(3B)-Cu(6)-O(4W)     | 71.7(11)  |
| Mo(12)-O(32) | 2.330(8)  | O(16)#2-Cu(6)-O(4W)   | 92.9(6)   |
| Mo(13)-O(34) | 1.702(12) | O(50)-Cu(6)-O(4W)     | 89.0(5)   |
| Mo(13)-O(59) | 1.757(9)  | O(2W)-Cu(6)-O(4W)     | 87.5(6)   |
| Mo(13)-O(33) | 1.800(9)  | O(3W)-Cu(6)-O(4W)     | 92.6(8)   |
| Mo(13)-O(35) | 2.094(11) | O(3B)-Cu(6)-O(1W)     | 110.4(10) |
| Mo(13)-O(64) | 2.117(11) | O(16)#2-Cu(6)-O(1W)   | 85.1(4)   |
| Mo(13)-O(43) | 2.267(10) | O(50)-Cu(6)-O(1W)     | 93.1(4)   |
| Mo(14)-O(37) | 1.727(10) | O(2W)-Cu(6)-O(1W)     | 89.9(5)   |
| Mo(14)-O(54) | 1.781(8)  | O(3W)-Cu(6)-O(1W)     | 90.0(7)   |
| Mo(14)-O(64) | 1.801(12) | O(4W)-Cu(6)-O(1W)     | 176.7(5)  |
| Mo(14)-O(56) | 1.989(10) | O(6)-Cu(5)-O(23W)     | 161.1(12) |
| Mo(14)-O(36) | 2.226(10) | O(6)-Cu(5)-O(9)       | 106.8(6)  |
| Mo(14)-O(43) | 2.384(8)  | O(23W)-Cu(5)-O(9)     | 87.0(10)  |

---

|              |           |                     |           |
|--------------|-----------|---------------------|-----------|
| Mo(15)-O(45) | 1.697(10) | O(6)-Cu(5)-O(24W)   | 83.3(10)  |
| Mo(15)-O(40) | 1.770(8)  | O(23W)-Cu(5)-O(24W) | 80.0(10)  |
| Mo(15)-O(35) | 1.803(13) | O(9)-Cu(5)-O(24W)   | 161.3(12) |
| Mo(15)-O(57) | 1.978(10) | O(6)-Cu(5)-O(22W)   | 101.9(10) |
| Mo(15)-O(36) | 2.213(9)  | O(23W)-Cu(5)-O(22W) | 87.2(10)  |
| Mo(15)-O(43) | 2.325(8)  | O(9)-Cu(5)-O(22W)   | 102.6(10) |
| Mo(16)-O(65) | 1.704(10) | O(24W)-Cu(5)-O(22W) | 90.3(10)  |
| Mo(16)-O(66) | 1.711(9)  | O(23W)-Na(1)-O(24W) | 93(2)     |
| Mo(16)-O(36) | 1.902(13) | O(23W)-Na(1)-O(6)   | 162(3)    |
| Mo(16)-O(55) | 1.969(13) | O(24W)-Na(1)-O(6)   | 88(3)     |
| Mo(16)-O(56) | 2.174(9)  | O(23W)-Na(1)-O(22W) | 95(3)     |
| Mo(16)-O(57) | 2.230(8)  | O(24W)-Na(1)-O(22W) | 104(2)    |
| V(1)-O(24)   | 1.693(9)  | O(6)-Na(1)-O(22W)   | 102(3)    |
| V(1)-O(1)    | 1.716(8)  | O(23W)-Na(1)-O(9)   | 81(2)     |
| V(1)-O(14)   | 1.722(7)  | O(24W)-Na(1)-O(9)   | 160(3)    |
| V(1)-O(21)   | 1.723(8)  | O(6)-Na(1)-O(9)     | 91.3(14)  |
| V(2)-O(31)   | 1.595(9)  | O(22W)-Na(1)-O(9)   | 97(2)     |
| V(2)-O(16)   | 1.657(9)  | O(23W)-Na(1)-O(23)  | 99(2)     |
| V(2)-O(8)    | 1.794(8)  | O(24W)-Na(1)-O(23)  | 101(3)    |
| V(2)-O(26)   | 1.815(9)  | O(6)-Na(1)-O(23)    | 63.9(13)  |
| V(3)-O(12)   | 1.658(8)  | O(22W)-Na(1)-O(23)  | 151(2)    |
| V(3)-O(38)   | 1.667(8)  | O(9)-Na(1)-O(23)    | 61.1(9)   |
| V(3)-O(43)   | 1.758(9)  | V(1)-O(1)-Mo(8)     | 127.4(4)  |
| V(3)-O(32)   | 1.779(9)  | V(1)-O(1)-Mo(5)     | 130.8(4)  |
| V(4)-O(11)   | 1.622(8)  | V(4)-O(2)-Mo(3)     | 138.6(4)  |
| V(4)-O(50)   | 1.657(9)  | V(4)-O(2)-Mo(6)     | 116.6(4)  |
| V(4)-O(2)    | 1.800(8)  | V(4)-O(3)-Mo(1)     | 139.4(4)  |
| V(4)-O(3)    | 1.818(8)  | V(4)-O(3)-Mo(2)     | 117.9(4)  |
| V(5)-O(1B)   | 1.583(15) | V(5)-O(4)-Mo(6)     | 131.3(5)  |
| V(5)-O(1A)   | 1.621(16) | V(5)-O(4)-Mo(3)     | 116.1(4)  |
| V(5)-O(4)    | 1.861(9)  | Mo(5)-O(5)-V(5)     | 130.8(5)  |
| V(5)-O(5)    | 1.942(9)  | V(5)-O(5)-Mo(9)     | 115.7(4)  |
| Cu(1)-O(44)  | 1.933(8)  | Cu(5)-O(6)-Mo(4)    | 111.7(6)  |
| Cu(1)-O(19)  | 1.966(8)  | V(2)-O(8)-Mo(9)     | 138.5(5)  |
| Cu(1)-O(17)  | 2.025(8)  | V(2)-O(8)-Mo(5)     | 117.8(4)  |
| Cu(1)-O(15)  | 2.034(8)  | V(4)-O(11)-Cu(1)    | 137.6(5)  |
| Cu(1)-O(11)  | 2.255(8)  | V(3)-O(12)-Cu(3)    | 119.4(4)  |
| Cu(1)-O(12)  | 2.259(8)  | V(3)-O(12)-Cu(1)    | 119.3(4)  |
| Cu(1)-Cu(2)  | 3.042(2)  | Cu(3)-O(12)-Cu(1)   | 90.7(3)   |
| Cu(2)-O(19)  | 1.943(8)  | V(1)-O(14)-Mo(1)    | 127.8(4)  |
| Cu(2)-O(52)  | 1.973(9)  | V(1)-O(14)-Mo(4)    | 128.3(4)  |
| Cu(2)-O(30)  | 2.076(8)  | Mo(10)-O(15)-Cu(2)  | 133.5(5)  |
| Cu(2)-O(15)  | 2.085(9)  | Cu(1)-O(15)-Cu(2)   | 95.2(4)   |
| Cu(2)-O(13)  | 2.252(8)  | Cu(2)-O(19)-Cu(1)   | 102.2(4)  |

|                  |           |                     |          |
|------------------|-----------|---------------------|----------|
| Cu(2)-O(54)      | 2.324(9)  | Cu(2)-O(19)-Cu(3)   | 103.8(3) |
| Cu(3)-O(33)      | 1.945(8)  | Cu(1)-O(19)-Cu(3)   | 107.6(3) |
| Cu(3)-O(18)      | 1.996(9)  | V(1)-O(21)-Mo(2)    | 129.2(4) |
| Cu(3)-O(54)      | 2.004(9)  | V(1)-O(21)-Mo(6)    | 130.3(4) |
| Cu(3)-O(19)      | 2.019(7)  | V(1)-O(24)-Mo(9)    | 131.6(4) |
| Cu(3)-O(31)      | 2.233(8)  | V(1)-O(24)-Mo(3)    | 132.3(4) |
| Cu(3)-O(12)      | 2.260(8)  | V(2)-O(26)-Mo(4)    | 139.4(5) |
| Cu(4)-O(40)      | 1.953(8)  | V(2)-O(26)-Mo(8)    | 117.9(4) |
| Cu(4)-O(61)#1    | 1.963(8)  | V(2)-O(31)-Cu(3)    | 136.6(5) |
| Cu(4)-O(38)      | 2.104(9)  | V(3)-O(32)-Mo(11)   | 125.2(4) |
| Cu(4)-O(53)#1    | 2.117(10) | V(3)-O(32)-Mo(12)   | 116.6(4) |
| Cu(4)-O(59)      | 2.144(11) | V(3)-O(32)-Mo(10)   | 121.2(4) |
| Cu(4)-O(38)#1    | 2.208(10) | V(3)-O(38)-Cu(4)#1  | 122.3(6) |
| Cu(6)-O(3B)      | 1.55(2)   | Cu(4)-O(38)-Cu(4)#1 | 99.6(3)  |
| Cu(6)-O(16)#2    | 1.908(9)  | Mo(15)-O(40)-Cu(4)  | 137.1(5) |
| Cu(6)-O(50)      | 1.930(9)  | V(3)-O(43)-Mo(13)   | 125.7(4) |
| Cu(6)-O(2W)      | 2.091(13) | V(3)-O(43)-Mo(15)   | 116.1(4) |
| Cu(6)-O(3W)      | 2.158(18) | V(3)-O(43)-Mo(14)   | 121.9(4) |
| Cu(6)-O(4W)      | 2.273(19) | Cu(3)-O(54)-Cu(2)   | 91.9(3)  |
| Cu(6)-O(1W)      | 2.343(13) | O(24)-V(1)-O(14)    | 104.8(4) |
| Cu(5)-O(6)       | 1.91(2)   | O(1)-V(1)-O(14)     | 112.7(4) |
| Cu(5)-O(23W)     | 2.00(3)   | O(24)-V(1)-O(21)    | 109.3(4) |
| Cu(5)-O(9)       | 2.016(15) | O(1)-V(1)-O(21)     | 108.9(4) |
| Cu(5)-O(24W)     | 2.21(3)   | O(14)-V(1)-O(21)    | 111.9(4) |
| Cu(5)-O(22W)     | 2.34(3)   | O(31)-V(2)-O(16)    | 108.1(5) |
| O(16)-Cu(6)#3    | 1.908(9)  | O(31)-V(2)-O(8)     | 106.6(4) |
| O(38)-Cu(4)#1    | 2.208(10) | O(16)-V(2)-O(8)     | 111.2(4) |
| O(53)-Cu(4)#1    | 2.117(10) | O(31)-V(2)-O(26)    | 106.6(4) |
| O(61)-Cu(4)#1    | 1.963(8)  | O(16)-V(2)-O(26)    | 113.2(5) |
| O(24)-V(1)-O(1)  | 109.0(4)  | O(8)-V(2)-O(26)     | 110.7(4) |
| O(12)-V(3)-O(32) | 108.4(4)  | O(12)-V(3)-O(38)    | 108.0(4) |
| O(38)-V(3)-O(32) | 110.0(5)  | O(12)-V(3)-O(43)    | 108.0(4) |
| O(43)-V(3)-O(32) | 114.1(4)  | O(38)-V(3)-O(43)    | 108.2(4) |
| O(11)-V(4)-O(50) | 107.5(4)  |                     |          |

Symmetry code for **2**: #1 -x,-y+1,-z+1 #2 x,-y+1,z-1/2 #3 x,-y+1,z+1/2

Table S4. Selected bond lengths [Å] and bond angles (°) for the compound **3**.

|               |           |                   |         |
|---------------|-----------|-------------------|---------|
| Mo(1)-O(33)   | 1.707(12) | O(15)-Cu(1)-O(23) | 83.3(3) |
| Mo(1)-O(31)#1 | 1.791(8)  | O(31)-Cu(1)-O(21) | 91.5(3) |
| Mo(1)-O(31)   | 1.791(8)  | O(14)-Cu(1)-O(21) | 87.4(3) |
| Mo(1)-O(32)   | 2.100(8)  | O(15)-Cu(1)-O(21) | 98.9(3) |
| Mo(1)-O(32)#1 | 2.100(8)  | O(23)-Cu(1)-O(21) | 89.1(3) |
| Mo(1)-O(34)   | 2.265(11) | O(31)-Cu(1)-O(24) | 91.3(3) |

---

|               |           |                     |          |
|---------------|-----------|---------------------|----------|
| Mo(2)-O(57)   | 1.683(8)  | O(14)-Cu(1)-O(24)   | 90.7(3)  |
| Mo(2)-O(23)   | 1.772(7)  | O(15)-Cu(1)-O(24)   | 78.6(3)  |
| Mo(2)-O(32)   | 1.821(9)  | O(23)-Cu(1)-O(24)   | 92.6(3)  |
| Mo(2)-O(53)   | 1.989(9)  | O(21)-Cu(1)-O(24)   | 176.7(3) |
| Mo(2)-O(55)   | 2.201(7)  | O(15)-Cu(2)-O(42)   | 174.1(3) |
| Mo(2)-O(34)   | 2.366(7)  | O(15)-Cu(2)-O(38)   | 94.7(3)  |
| Mo(3)-O(49)   | 1.726(13) | O(42)-Cu(2)-O(38)   | 88.5(3)  |
| Mo(3)-O(16)#1 | 1.783(7)  | O(15)-Cu(2)-O(22)   | 82.1(3)  |
| Mo(3)-O(16)   | 1.783(7)  | O(42)-Cu(2)-O(22)   | 94.6(3)  |
| Mo(3)-O(43)   | 2.114(8)  | O(15)-Cu(2)-O(17)   | 95.5(3)  |
| Mo(3)-O(43)#1 | 2.114(8)  | O(42)-Cu(2)-O(17)   | 89.4(4)  |
| Mo(3)-O(44)   | 2.262(11) | O(38)-Cu(2)-O(17)   | 88.9(3)  |
| Mo(4)-O(56)   | 1.717(8)  | O(22)-Cu(2)-O(17)   | 92.2(3)  |
| Mo(4)-O(56)#1 | 1.717(8)  | O(15)-Cu(2)-O(23)   | 79.1(3)  |
| Mo(4)-O(55)   | 1.953(13) | O(42)-Cu(2)-O(23)   | 95.9(3)  |
| Mo(4)-O(54)   | 1.966(13) | O(38)-Cu(2)-O(23)   | 92.5(3)  |
| Mo(4)-O(53)#1 | 2.201(7)  | O(22)-Cu(2)-O(23)   | 86.2(3)  |
| Mo(4)-O(53)   | 2.201(7)  | O(16)-Cu(3)-O(39)   | 93.9(3)  |
| Mo(5)-O(35)   | 1.688(9)  | O(15)-Cu(3)-O(39)   | 93.0(3)  |
| Mo(5)-O(29)   | 1.705(8)  | O(16)-Cu(3)-O(22)   | 93.3(3)  |
| Mo(5)-O(4)    | 1.879(8)  | O(15)-Cu(3)-O(22)   | 80.1(3)  |
| Mo(5)-O(5)    | 1.966(8)  | O(16)-Cu(3)-O(24)   | 91.6(3)  |
| Mo(5)-O(20)   | 2.285(8)  | O(15)-Cu(3)-O(24)   | 80.1(3)  |
| Mo(5)-O(3)    | 2.327(8)  | O(39)-Cu(3)-O(24)   | 89.8(3)  |
| Mo(6)-O(50)   | 1.686(8)  | O(22)-Cu(3)-O(24)   | 91.8(3)  |
| Mo(6)-O(22)   | 1.793(8)  | O(16)-Cu(3)-O(37)   | 89.2(3)  |
| Mo(6)-O(43)   | 1.809(9)  | O(15)-Cu(3)-O(37)   | 99.6(3)  |
| Mo(6)-O(53)   | 1.966(9)  | O(39)-Cu(3)-O(37)   | 85.6(3)  |
| Mo(6)-O(54)   | 2.193(6)  | O(22)-Cu(3)-O(37)   | 92.8(3)  |
| Mo(6)-O(44)   | 2.371(7)  | O(1W)-Cu(4)-O(3W)   | 178.4(4) |
| Mo(7)-O(46)   | 1.685(9)  | O(1W)-Cu(4)-O(30)   | 88.7(4)  |
| Mo(7)-O(14)   | 1.738(8)  | O(3W)-Cu(4)-O(30)   | 89.9(4)  |
| Mo(7)-O(13)   | 1.909(8)  | O(1W)-Cu(4)-O(47)#2 | 90.5(4)  |
| Mo(7)-O(20)   | 2.029(8)  | O(3W)-Cu(4)-O(47)#2 | 90.9(4)  |
| Mo(7)-O(4)    | 2.057(8)  | O(1W)-Cu(4)-O(4W)   | 87.5(4)  |
| Mo(7)-O(19)   | 2.336(8)  | O(3W)-Cu(4)-O(4W)   | 93.3(4)  |
| Mo(8)-O(45)   | 1.698(9)  | O(30)-Cu(4)-O(4W)   | 89.3(4)  |
| Mo(8)-O(28)   | 1.708(8)  | O(47)#2-Cu(4)-O(4W) | 89.8(4)  |
| Mo(8)-O(5)    | 1.918(8)  | O(1W)-Cu(4)-O(2W)   | 92.1(4)  |
| Mo(8)-O(6)    | 1.950(8)  | O(3W)-Cu(4)-O(2W)   | 87.1(4)  |
| Mo(8)-O(8)    | 2.256(8)  | O(30)-Cu(4)-O(2W)   | 90.8(4)  |
| Mo(8)-O(3)    | 2.317(8)  | O(47)#2-Cu(4)-O(2W) | 90.2(4)  |
| Mo(9)-O(12)   | 1.682(8)  | O(4W)-Cu(4)-O(2W)   | 179.6(4) |
| Mo(9)-O(39)   | 1.735(9)  | O(58)-Cu(5)-O(5W)   | 88.7(9)  |

---

---

|              |          |                      |           |
|--------------|----------|----------------------|-----------|
| Mo(9)-O(13)  | 1.899(8) | O(58)#3-Cu(5)-O(5W)  | 88.7(9)   |
| Mo(9)-O(2)   | 2.026(8) | O(58)-Cu(5)-O(15W)   | 96.7(6)   |
| Mo(9)-O(1)   | 2.074(8) | O(58)#3-Cu(5)-O(15W) | 96.7(6)   |
| Mo(9)-O(19)  | 2.327(8) | O(5W)-Cu(5)-O(15W)   | 103.6(18) |
| Mo(10)-O(26) | 1.709(8) | O(58)-Cu(5)-O(14W)   | 87.8(9)   |
| Mo(10)-O(40) | 1.706(9) | O(58)#3-Cu(5)-O(14W) | 87.8(9)   |
| Mo(10)-O(1)  | 1.857(8) | O(5W)-Cu(5)-O(14W)   | 149.6(18) |
| Mo(10)-O(10) | 1.970(9) | O(15W)-Cu(5)-O(14W)  | 107(2)    |
| Mo(10)-O(2)  | 2.295(8) | O(58)-Na(1)-O(5W)    | 90(3)     |
| Mo(10)-O(27) | 2.314(8) | O(58)#3-Na(1)-O(5W)  | 90(3)     |
| Mo(11)-O(41) | 1.692(9) | O(58)-Na(1)-O(14W)   | 91(3)     |
| Mo(11)-O(25) | 1.699(8) | O(58)#3-Na(1)-O(14W) | 91(3)     |
| Mo(11)-O(10) | 1.905(8) | O(5W)-Na(1)-O(14W)   | 166(4)    |
| Mo(11)-O(7)  | 1.957(8) | O(58)-Na(1)-O(15W)   | 87.5(18)  |
| Mo(11)-O(11) | 2.255(8) | O(58)#3-Na(1)-O(15W) | 87.5(18)  |
| Mo(11)-O(27) | 2.314(8) | O(5W)-Na(1)-O(15W)   | 94(3)     |
| Mo(12)-O(48) | 1.666(9) | O(14W)-Na(1)-O(15W)  | 99(4)     |
| Mo(12)-O(17) | 1.720(8) | O(24)#1-V(1)-O(24)   | 107.1(5)  |
| Mo(12)-O(18) | 1.906(8) | O(24)#1-V(1)-O(44)   | 109.3(4)  |
| Mo(12)-O(11) | 1.999(8) | O(24)-V(1)-O(44)     | 109.3(4)  |
| Mo(12)-O(7)  | 2.177(8) | O(24)#1-V(1)-O(34)   | 110.1(4)  |
| Mo(12)-O(9)  | 2.361(8) | O(24)-V(1)-O(34)     | 110.1(4)  |
| Mo(13)-O(36) | 1.640(8) | O(44)-V(1)-O(34)     | 110.7(5)  |
| Mo(13)-O(38) | 1.732(8) | O(9)-V(2)-O(19)      | 104.9(4)  |
| Mo(13)-O(18) | 1.904(8) | O(9)-V(2)-O(27)      | 110.5(4)  |
| Mo(13)-O(8)  | 1.973(8) | O(19)-V(2)-O(27)     | 111.2(4)  |
| Mo(13)-O(6)  | 2.158(8) | O(9)-V(2)-O(3)       | 110.6(4)  |
| Mo(13)-O(9)  | 2.363(8) | O(19)-V(2)-O(3)      | 111.4(4)  |
| Cu(1)-O(31)  | 1.993(8) | O(27)-V(2)-O(3)      | 108.1(3)  |
| Cu(1)-O(14)  | 2.028(8) | O(37)-V(3)-O(30)     | 107.7(5)  |
| Cu(1)-O(15)  | 2.022(8) | O(37)-V(3)-O(2)      | 106.8(4)  |
| Cu(1)-O(23)  | 2.060(8) | O(30)-V(3)-O(2)      | 111.7(4)  |
| Cu(1)-O(21)  | 2.203(9) | O(37)-V(3)-O(11)     | 108.6(4)  |
| Cu(1)-O(24)  | 2.213(8) | O(30)-V(3)-O(11)     | 112.0(4)  |
| Cu(2)-O(15)  | 1.954(7) | O(2)-V(3)-O(11)      | 109.9(4)  |
| Cu(2)-O(42)  | 1.961(8) | O(21)-V(4)-O(47)     | 108.2(5)  |
| Cu(2)-O(38)  | 2.032(8) | O(21)-V(4)-O(20)     | 106.1(4)  |
| Cu(2)-O(22)  | 2.085(8) | O(47)-V(4)-O(20)     | 112.4(4)  |
| Cu(2)-O(17)  | 2.226(9) | O(21)-V(4)-O(8)      | 107.5(4)  |
| Cu(2)-O(23)  | 2.287(8) | O(47)-V(4)-O(8)      | 112.9(4)  |
| Cu(3)-O(16)  | 1.968(8) | O(20)-V(4)-O(8)      | 109.3(4)  |
| Cu(3)-O(15)  | 1.998(7) | Mo(10)-O(1)-V(5B)    | 131.9(6)  |
| Cu(3)-O(39)  | 2.077(9) | V(5B)-O(1)-Mo(9)     | 112.7(6)  |
| Cu(3)-O(22)  | 2.121(8) | V(3)-O(2)-Mo(9)      | 139.2(4)  |

---

---

|               |           |                     |           |
|---------------|-----------|---------------------|-----------|
| Cu(3)-O(24)   | 2.171(8)  | V(3)-O(2)-Mo(10)    | 119.6(4)  |
| Cu(3)-O(37)   | 2.191(10) | V(2)-O(3)-Mo(8)     | 129.8(4)  |
| Cu(4)-O(1W)   | 1.964(9)  | V(2)-O(3)-Mo(5)     | 128.2(4)  |
| Cu(4)-O(3W)   | 1.980(9)  | Mo(5)-O(4)-V(5B)    | 132.3(6)  |
| Cu(4)-O(30)   | 2.023(9)  | V(5B)-O(4)-Mo(7)    | 113.0(6)  |
| Cu(4)-O(47)#2 | 2.026(9)  | V(5)-O(6)-Mo(8)     | 136.2(4)  |
| Cu(4)-O(4W)   | 2.304(13) | V(5)-O(6)-Mo(13)    | 114.0(4)  |
| Cu(4)-O(2W)   | 2.342(12) | V(5)-O(7)-Mo(11)    | 137.6(5)  |
| Cu(5)-O(58)   | 1.924(11) | V(5)-O(7)-Mo(12)    | 112.4(4)  |
| Cu(5)-O(58)#3 | 1.924(11) | V(4)-O(8)-Mo(13)    | 139.0(4)  |
| Cu(5)-O(5W)   | 2.05(4)   | V(4)-O(8)-Mo(8)     | 116.6(4)  |
| Cu(5)-O(15W)  | 2.21(5)   | V(2)-O(9)-Mo(12)    | 132.2(4)  |
| Cu(5)-O(14W)  | 2.10(4)   | V(2)-O(9)-Mo(13)    | 130.8(4)  |
| Na(1)-O(58)   | 1.913(11) | V(3)-O(11)-Mo(12)   | 135.2(4)  |
| Na(1)-O(58)#3 | 1.913(11) | V(3)-O(11)-Mo(11)   | 119.2(4)  |
| Na(1)-O(5W)   | 2.03(10)  | Cu(2)-O(15)-Cu(3)   | 101.6(3)  |
| Na(1)-O(14W)  | 2.00(10)  | Cu(2)-O(15)-Cu(1)   | 104.0(3)  |
| Na(1)-O(15W)  | 2.51(7)   | Cu(3)-O(15)-Cu(1)   | 106.6(3)  |
| V(1)-O(24)#1  | 1.664(7)  | V(2)-O(19)-Mo(9)    | 129.0(4)  |
| V(1)-O(24)    | 1.664(7)  | V(2)-O(19)-Mo(7)    | 129.3(4)  |
| V(1)-O(44)    | 1.759(11) | V(4)-O(20)-Mo(7)    | 140.7(4)  |
| V(1)-O(34)    | 1.765(11) | V(4)-O(20)-Mo(5)    | 118.5(4)  |
| V(2)-O(9)     | 1.681(8)  | V(4)-O(21)-Cu(1)    | 135.2(5)  |
| V(2)-O(19)    | 1.720(8)  | Mo(6)-O(22)-Cu(3)   | 130.2(4)  |
| V(2)-O(27)    | 1.716(8)  | Cu(2)-O(22)-Cu(3)   | 93.5(3)   |
| V(2)-O(3)     | 1.720(7)  | Cu(1)-O(23)-Cu(2)   | 92.1(3)   |
| V(3)-O(37)    | 1.631(9)  | V(1)-O(24)-Cu(3)    | 122.6(4)  |
| V(3)-O(30)    | 1.645(8)  | V(1)-O(24)-Cu(1)    | 120.9(4)  |
| V(3)-O(2)     | 1.794(9)  | Cu(3)-O(24)-Cu(1)   | 94.7(3)   |
| V(3)-O(11)    | 1.805(8)  | V(2)-O(27)-Mo(10)   | 129.2(4)  |
| V(4)-O(21)    | 1.622(8)  | V(2)-O(27)-Mo(11)   | 129.4(4)  |
| V(4)-O(47)    | 1.645(9)  | V(1)-O(34)-Mo(1)    | 122.7(5)  |
| V(4)-O(20)    | 1.800(8)  | V(1)-O(34)-Mo(2)    | 120.6(3)  |
| V(4)-O(8)     | 1.813(8)  | V(1)-O(34)-Mo(2)#1  | 120.6(3)  |
| O(1)-V(5B)    | 1.912(18) | V(1)-O(44)-Mo(3)    | 122.3(5)  |
| O(4)-V(5B)    | 1.925(18) | V(1)-O(44)-Mo(6)    | 120.8(3)  |
| O(6)-V(5)     | 1.848(8)  | V(1)-O(44)-Mo(6)#1  | 120.8(3)  |
| O(7)-V(5)     | 1.855(8)  | O(59)-V(5)-O(58)    | 107.0(6)  |
| O(34)-Mo(2)#1 | 2.366(7)  | O(59)-V(5)-O(6)     | 106.0(5)  |
| O(44)-Mo(6)#1 | 2.371(7)  | O(58)-V(5)-O(6)     | 113.5(5)  |
| O(47)-Cu(4)#4 | 2.026(9)  | O(59)-V(5)-O(7)     | 105.1(5)  |
| O(54)-Mo(6)#1 | 2.193(6)  | O(58)-V(5)-O(7)     | 112.4(5)  |
| O(55)-Mo(2)#1 | 2.201(7)  | O(6)-V(5)-O(7)      | 112.2(4)  |
| V(5)-O(59)    | 1.602(11) | O(59B)-V(5B)-O(58B) | 106.5(11) |

---

---

|                   |           |                   |           |
|-------------------|-----------|-------------------|-----------|
| V(5)-O(58)        | 1.619(12) | O(59B)-V(5B)-O(1) | 109.0(11) |
| V(5B)-O(59B)      | 1.605(15) | O(58B)-V(5B)-O(1) | 108.6(11) |
| V(5B)-O(58B)      | 1.625(15) | O(59B)-V(5B)-O(4) | 109.4(11) |
| O(31)-Cu(1)-O(14) | 92.2(3)   | O(58B)-V(5B)-O(4) | 108.0(11) |
| O(14)-Cu(1)-O(15) | 92.5(3)   | O(1)-V(5B)-O(4)   | 115.0(9)  |
| O(31)-Cu(1)-O(23) | 92.8(3)   |                   |           |

---

Symmetry code for 3: #1 x,y,-z #2 x-1/2,-y+3/2,-z+1/2 #3 x,y,-z+1 #4 x+1/2, -y+3/2, -z+1/2
